# Supplementary material
Source: PubMed Central journal article supplement (PMC5808937)
Supplement: NIHMS939763-supplement-SupplementaryFig1.pdf [file NIHMS939763-supplement-SupplementaryFig1.pdf]

A

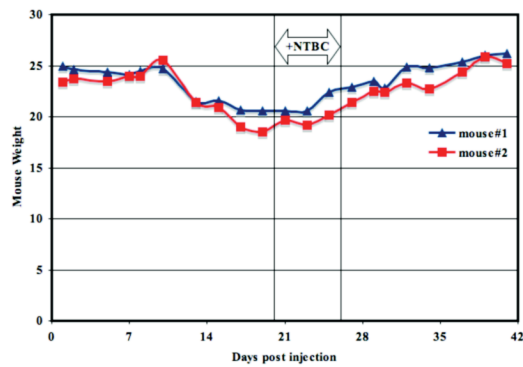

B

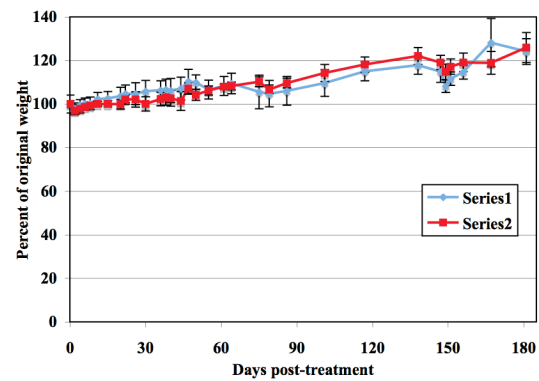

C

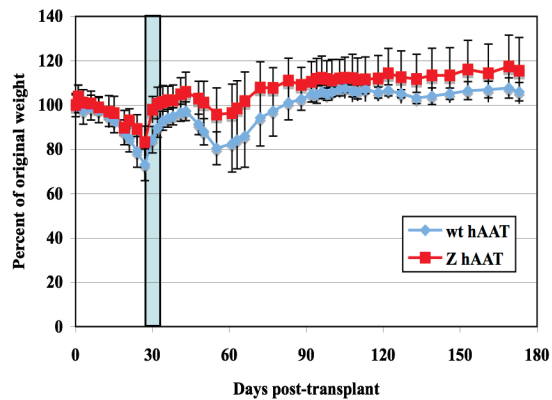

D

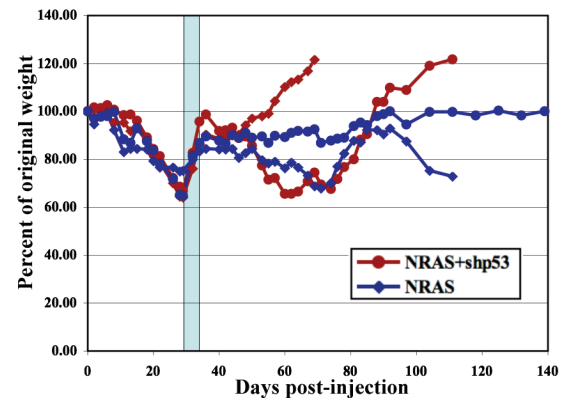

**Supplementary Figure** Stabilization of mouse weight after removal of NTBC indicates a therapeutic correction of FAH expression in FAH deficient mice. Mouse weights were graphed for co-expression experiments. (A) repopulation using pKT2/FAHIL//SB. During the first two weeks the mouse weight decreased to less than 2/3 of pretreatment level, and a pulse of NTBC was administered as in previous studies (Montini, Held). After the NTBC was removed the mouse weights continued to increase, eventually surpassing pre-treatment levels. (B) Graph of the weights of mice injected with pKT2/FAH-hAAT//SB (blue) or pKT2/FAH-Z//SB (red). The average initial weight is set at 100 percent, and the average percent of initial weight is graphed over time. (C) Graph of the weights of transplant recipient mice, with donor hepatocytes isolated from mice repopulated using pKT2/FAH-hAAT//SB (blue) or pKT2/FAH-Z//SB (red). The shaded area represents treatment with NTBC. (D) Percent initial weight for individual FAH-deficient mice injected with SB plasmid plus pKT2/FAHIL-NRAS and pT2/sh.p53-GFP (in red) or pKT2/FAHIL-NRAS alone (in blue).
