# Supplementary material
Source: PubMed Central journal article supplement (PMC5808937)
Supplement: NIHMS939763-supplement-SupplementaryTable1.pdf [file NIHMS939763-supplement-SupplementaryTable1.pdf]

## Supplementary Table

| pKT2/FAHIL//SB                 |            |                     |
|--------------------------------|------------|---------------------|
| Genomic Sequence               | Chromosome | Refseq              |
| <<FAHIL>>TATGCTCCAAATGAGAGGAC  | 3          | Nearest gene ~300kb |
| <<FAHIL>>TATCAGTCCCTCCAGAACAC  | 2          | Intron of NM_028747 |
| <<FAHIL>>TATGAATGTATGCTATGCCA  | 3          | Intron of Amy2      |
| <<FAHIL>>TAACACGAGGCCAGTACAAG  | 7          | Nearest gene ~300kb |
| <<FAHIL>>TAGGTCTGCTGAATACCAGA  | 9          | Intron of Senp6     |
| <<FAHIL>>TATATGTGCCATTTTATATG  | 10         | Nearest gene ~20kb  |
| <<FAHIL>>TACATGGAACCTCCAAGCTGT | 11         | Nearest gene ~130kb |
| <<FAHIL>>TAGGCCTATTAGGGAGAAGA  | 11         | Nearest gene ~250kb |
| <<FAHIL>>TATAATACACACAAGACACA  | 16         | Intron of Runx      |

  

| pKT2/FAH-hAAT//SB                 |            |                     |
|-----------------------------------|------------|---------------------|
| Genomic Sequence                  | Chromosome | Refseq              |
| <<FAH-hAAT>>TATCCCTGGCTGTCCATGGG  | 15         | Intron of Krt1-18   |
| <<FAH-hAAT>>TACCGGGTAGGGGAGGCGCT  | X          | nearest gene 130 kb |
| <<FAH-hAAT>>TACTACTCCCTATTTCAGTCC | 1          | Intron of Ddr2      |

  

| pKT2/FAHIL-NRAS or pT2/sh.p53-GFP |            |                     |
|-----------------------------------|------------|---------------------|
| Genomic Sequence                  | Chromosome | Refseq              |
| <<Onc>>TATGTCTCCTGGTAACATCA       | 3          | Nearest gene ~15kb  |
| <<Onc>>TATGTATTGGATATTAGACC       | 7          | Nearest gene ~2.5kb |
| <<Onc>>TAAATGAGGATCAGGCTAAT       | 7          | Nearest gene ~120kb |
| <<Onc>>TATATTCCCGAAAAGGGTT        | X          | Nearest gene ~140kb |
| <<Onc>>TACCTTCAATCCCAGCACTT       | 2          | Intron of Slc9a8    |
| <<Onc>>TACCTATCTCAGTCAACAAG       | 2          | Intron of C20orf67  |
| <<Onc>>TAGGTATAGACTTGACTGCC       | 8          | Nearest gene ~6kb   |

**Supplementary Table** Genomic insertion sites of co-expression constructs were recovered from mouse liver DNA extracts. The first 20 nucleotides of genomic sequence are shown, as well as the corresponding chromosome and Refseq information. All integration sites had a TA dinucleotide flanking the terminus of the transposon, a hallmark of SB transposition.

**Methods** For pKT2/FAHIL//SB and pKT2/FAH-hAAT//SB insertion sites were recovered by inverse PCR as described<sup>1</sup>. For oncogene insertion site recovery linker mediated PCR was used as described<sup>2</sup>. The sequence results were analyzed by nucleotide-nucleotide BLAST (<http://www.ncbi.nlm.nih.gov/BLAST>) and the genomic context was further defined using mouse BLAT (<http://genome.ucsc.edu>).

1. A. Wilber, Wangenstein, K. J., Chen, Y., Zhou, L., Frandsen, J. L., Bell, J. B., Zongyu, J. C., Ekker, S. C., McIvor, R. S., Wang, X., *Mol Ther* (2007).
2. V. W. Keng, K. Yae, T. Hayakawa et al., *Nat Methods* **2** (10), 763 (2005).
